# Supplementary material for: In-Vitro Subtype-Specific Modulation of HIV-1 Trans-Activator of Transcription (Tat) on RNAi Silencing Suppressor Activity and Cell Death
Source: MDPI journal article supplement (doi:10.3390/v11110976), 2019-10-23
Supplement: s1 [file s1]

Sequence: pSIREN-RetroQ-ZsGreen1 (1).dna (Linear / 6562 bp)

Enzymes: Unique 6+ Cutters (33 of 653 total)

Features: 15 total

Primers: 1 total

Unique Cutters **Bold**

Linearized retroviral vector for inserting an shRNA cassette that will be co-expressed with ZsGreen1.

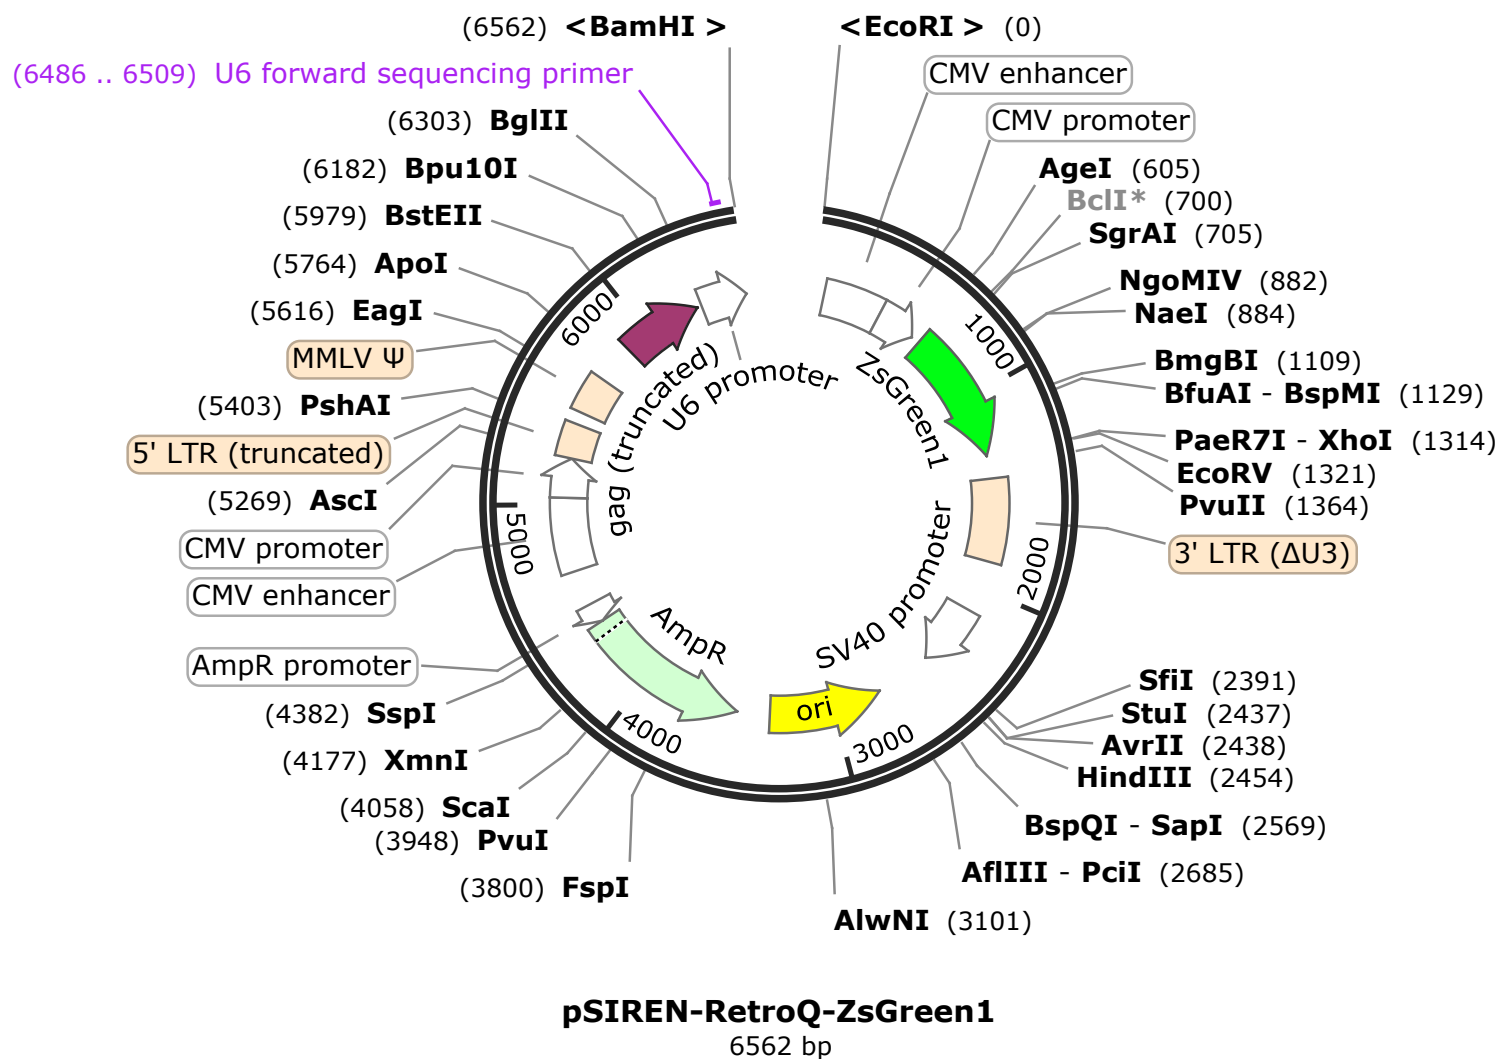

|                                                  |      |
|--------------------------------------------------|------|
| AATTCTAGTTATTAATAGTAATCAATTACGGGGTTCATTAGTTCAT   | 45   |
| AGCCCATATATGGAGTTCCGCGTTACATAACTTACGGTAAATGGC    | 90   |
| CCGCCTGGCTGACCGCCCAACGACCCCCGCCCATTTGACGTCAATA   | 135  |
| ATGACGTATGTTCCCATAGTAACGCCAATAGGGACTTTCCATTGA    | 180  |
| CGTCAATGGGTGGAGTATTTACGGTAAACTGCCCACTTGGCAGTA    | 225  |
| CATCAAGTGTATCATATGCCAAGTACGCCCCCTATTGACGTCAAT    | 270  |
| GACGGTAAATGGCCCGCCTGGCATTATGCCCAGTACATGACCTTA    | 315  |
| TGGGACTTTTCCTACTTGGCAGTACATCTACGTATTAGTCATCGCT   | 360  |
| ATTACCATGGTGATGCGGTTTTTGGCAGTACATCAATGGGCGTGGA   | 405  |
| TAGCGGTTTTGACTCACGGGGATTTCCTCAAGTCTCCACCCCATTGAC | 450  |
| GTCAATGGGAGTTTTGTTTTTGGCACCAAAATCAACGGGACTTTCCA  | 495  |
| AAATGTCGTAACAACCTCCGCCCCATTGACGCAAAATGGGCGGTAGG  | 540  |
| CGTGACGGTGGGAGGTCTATATAAGCAGAGCTGGTTTAGTGAAC     | 585  |
| CGTCAGATCCGCTAGCGCTACCGGTCGCCACCATGGGCCAGTCCA    | 630  |
| AGCACGGCCTGACCAAGGAGATGACCATGAAGTACCGCATGGAGG    | 675  |
| GCTGCGTGGACGGCCACAAGTTCGTGATCACCGGCGAGGGCATCG    | 720  |
| GCTACCCCTTCAAGGGCAAGCAGGCCATCAACCTGTGCGTGGTGG    | 765  |
| AGGGCGGGCCCTTGCCCTTCGCCGAGGACATCTTGTCCGCCGCCT    | 810  |
| TCATGTACGGCAACCGCGTGTTCACCGAGTACCCCCAGGACATCG    | 855  |
| TCGACTACTTCAAGAACTCCTGCCCCGCCGGCTACACCTGGGACC    | 900  |
| GCTCCTTTCCTGTTTCGAGGACGGCGCCGTGTGCATCTGCAACGCCG  | 945  |
| ACATCACCGTGAGCGTGGAGGAGAACTGCATGTACCACGAGTCCA    | 990  |
| AGTTCTACGGCGTGAACCTTCCCCGCCGACGGCCCCGTGATGAAGA   | 1035 |
| AGATGACCGACAACCTGGGAGCCCTCCTGCGAGAAGATCATCCCCG   | 1080 |
| TGCCCAAGCAGGGCATCTTGAAGGGCGACGTGAGCATGTACCTGC    | 1125 |
| TGCTGAAGGACGGTGGCCGCTTGCCTGCCAGTTCGACACCGTGT     | 1170 |
| ACAAGGCCAAGTCCGTGCCCCGCAAGATGCCCGACTGGCACTTCA    | 1215 |
| TCCAGCACAAAGCTGACCCGCGAGGACCGCAGCGACGCCAAGAACC   | 1260 |
| AGAAGTGGCACCTGACCGAGCACGCCATCGCCTCCGGCTCCGCCT    | 1305 |
| TGCCCTAACTCGAGATATCAGTGGTCCAGGCTCTAGTTTTTGACTC   | 1350 |
| AACAATATCACCAGCTGAAGCCTATAGAGTACGAGCCATAGATAA    | 1395 |
| AATAAAAGATTTTTATTTAGTCTCCAGAAAAAGGGGGGAATGAAAG   | 1440 |
| ACCCACCTGTAGGTTTTGGCAAGCTAGCTTAAGTAACGCCATTTT    | 1485 |
| GCAAGGCATGGA AAAAATACATAACTGAGAATAGAGAAGTT CAGAT | 1530 |
| CAAGGTCAGGAACAGATGGAACAGGGTCGACCCTAGAGAACCATC    | 1575 |
| AGATGTTTTCCAGGGTGCCCCAAGGACCTGAAATGACCCTGTGCCT   | 1620 |
| TATTTGAACTAACCAATCAGTTCGCTTCTCGCTTCTGTTTCGCGCG   | 1665 |
| CTTCTGCTCCCCGAGCTCAATAAAAGAGCCACAACCCCTCACTC     | 1710 |
| GGGGCGCCAGTCCCTCCGATTGACTGAGTCGCCCGGGTACCCGTGT   | 1755 |
| ATCCAATAAACCCCTCTTGCAAGTTGCATCCGACTTGTGGTCTCGCT  | 1800 |
| GTTCTTGGGAGGGTCTCCTCTGAGTGATTGACTACCCGTCAGCG     | 1845 |
| GGGGTCTTTTCATTTGGGGGCTCGTCCGGGATCGGGAGACCCCTGC   | 1890 |
| CCAGGGACCACCGACCCACCACCGGGAGGTAAGCTGGCTGCCTCG    | 1935 |
| CGCGTTTCGGTGATGACGGTGAAAACCTCTGACACATGCAGCTCC    | 1980 |
| CGGAGACGGTCACAGCTTGTCTGTAAGCGGATGCCGGGAGCAGAC    | 2025 |
| AAGCCCGTCAGGGCGCGTCAAGCGGGTGTGGCGGGGTGTCGGGGCG   | 2070 |
| CAGCCATGACCCAGTCACGTAGCGATAGCGGAGTGATAGATCCGGC   | 2115 |
| TGTGGAATGTGTGTCAGTTAGGGTGTGGAAAGTCCCCAGGCTCCC    | 2160 |

|                                                 |      |
|-------------------------------------------------|------|
| CAGCAGGCAGAAAGTATGCAAAGCATGCATCTCAATTAGTCAGCAA  | 2205 |
| CCAGGTGTGGAAAGTCCCCAGGCTCCCCAGCAGGCAGAAAGTATGC  | 2250 |
| AAAGCATGCATCTCAATTAGTCAGCAACCATAGTCCCGCCCCCTAA  | 2295 |
| CTCCGCCCATCCCGCCCCCTAACTCCGCCCAGTTCCGCCCATTTCTC | 2340 |
| CGCCCCATGGCTGACTAATTTTTTTTTTATTTATGCAGAGGCCGAGG | 2385 |
| CCGCCTCGGCCTCTGAGCTATTCCAGAAGTAGTGAGGAGGCTTTT   | 2430 |
| TTGGAGGCTAGGCTTTTTGCAAAAGCTTACTGGCTTAACTATGC    | 2475 |
| GGCATCAGAGCAGATTGTACTGAGAGTGCACCATATGCGGTGTGA   | 2520 |
| AATACCGCACAGATGCGTAAGGAGAAAATACCGCATCAGGCGCTC   | 2565 |
| TTCCGCTTCCTCGCTCACTGACTCGCTGCGCTCGGTCTGTTCCGGCT | 2610 |
| GCGGCGAGCGGTATCAGCTCACTCAAAGGCGGTAATACGGTTATC   | 2655 |
| CACAGAATCAGGGGATAACGCAGGAAAGAACATGTGAGCAAAAGG   | 2700 |
| CCAGCAAAAGGCCAGGAACCGTAAAAAGGCCGCGTTGCTGGCGTT   | 2745 |
| TTTCCATAGGCTCCGCCCCCTGACGAGCATCACAAAAATCGACG    | 2790 |
| CTCAAGTCAGAGGTGGCGAAACCCGACAGGACTATAAAGATACCA   | 2835 |
| GGCGTTTCCCCCTGGAAGCTCCCTCGTGCGCTCTCCTGTTCCGAC   | 2880 |
| CCTGCCGCTTACCGGATACCTGTCCGCCTTTCTCCCTTCGGGAAG   | 2925 |
| CGTGCGCTTTCTCATAGCTCACGCTGTAGGTATCTCAGTTCGGT    | 2970 |
| GTAGGTCGTTTCGCTCCAAGCTGGGCTGTGTGCACGAACCCCCGT   | 3015 |
| TCAGCCCGACCGCTGCGCCTTATCCGGTAACTATCGTCTTGAGTC   | 3060 |
| CAACCCGGTAAGACACGACTTATCGCCACTGGCAGCAGCCACTGG   | 3105 |
| TAACAGGATTAGCAGAGCGAGGTATGTAGGCGGTGCTACAGAGTT   | 3150 |
| CTTGAAGTGGTGGCCTAACTACGGCTACACTAGAAGGACAGTATT   | 3195 |
| TGGTATCTGCGCTCTGCTGAAGCCAGTTACCTTCGGAAAAAAGAGT  | 3240 |
| TGGTAGCTCTTGATCCGGCAAACAAACCACCGCTGGTAGCGGTGG   | 3285 |
| TTTTTTTTGTTTGCAAGCAGCAGATTACGCGCAGAAAAAAAGGATC  | 3330 |
| TCAA GAAGATCCTTTGATCTTTTCTACGGGGTCTGACGCTCAGTG  | 3375 |
| GAACGAAAACCTCACGTTAAGGGATTTTGGTTCATGAGATTATCAA  | 3420 |
| AAGGATCTTCACCTAGATCCTTTTAAATTAAAAATGAAGTTTTAA   | 3465 |
| ATCAATCTAAAGTATATATGAGTAAACTTGGTCTGACAGTTACCA   | 3510 |
| ATGCTTAATCAGTGAGGCACCTATCTCAGCGATCTGTCTATTTTCG  | 3555 |
| TTCATCCATAGTTGCCTGACTCCCCGTCGTGTAGATAACTACGAT   | 3600 |
| ACGGGAGGGCTTACCATCTGGCCCCAGTGCTGCAATGATACCGCG   | 3645 |
| AGACCCACGCTCACCGGCTCCAGATTTATCAGCAATAAACCAGCC   | 3690 |
| AGCCGGAAGGGCCGAGCGCAGAAGTGGTCCTGCAACTTTATCCGC   | 3735 |
| CTCCATCCAGTCTATTAATTGTTGCCGGGAAGCTAGAGTAAGTAG   | 3780 |
| TTCGCCAGTTAATAGTTTTCGCGCAACGTTGTTGCCATTGCTGCAGG | 3825 |
| CATCGTGGTGTACGCTCGTCGTTTGGTATGGCTTCATTTCAGCTC   | 3870 |
| CGGTTCCCAACGATCAAGGCGAGTTACATGATCCCCCATGTTGTG   | 3915 |
| CAAAAAAGCGGTTAGCTCCTTCGGTCCTCCGATCGTTGTCAGAAG   | 3960 |
| TAAGTTGGCCGCGAGTGTTATCACTCATGGTTATGGCAGCACTGCA  | 4005 |
| TAATTCTCTTACTGTTCATGCCATCCGTAAGATGCTTTTCTGTGAC  | 4050 |
| TGGTGAGTACTCAACCAAGTCATTCTGAGAATAGTGTATGCGGCG   | 4095 |
| ACCGAGTTGCTCTTGCCCGGCGTCAACACGGGATAATACCGCGCC   | 4140 |
| ACATAGCAGAACTTTAAAAGTGCTCATCATTGGAAAACGTTCTTC   | 4185 |
| GGGGCGAAAACCTCTCAAGGATCTTACCGCTGTTGAGATCCAGTTC  | 4230 |
| GATGTAACCCACTCGTGCACCCAACCTGATCTTCAGCATCTTTTAC  | 4275 |
| TTTACCAGCGTTTCTGGGTGAGCAAAAACAGGAAGGCCAAAATGC   | 4320 |

|                                                |      |
|------------------------------------------------|------|
| CGCAAAAAAGGGAATAAGGGCGACACGGAAATGTTGAATACTCAT  | 4365 |
| ACTCTTCCTTTTTCAATATTATTGAAGCATTTATCAGGGTTATTG  | 4410 |
| TCTCATGAGCGGATACATATTTGAATGTATTTAGAAAAATAACA   | 4455 |
| AATAGGGGTTCCGCGCACATTTCCCCGAAAAGTGCCACCTGACGT  | 4500 |
| CTAAGAAACCATTATTATCATGACATTAACCTATAAAAAATAGGCG | 4545 |
| TATCACGAGGCCCTTTTCGTCTTCAAGAATTAGCTTGGCCATTGCA | 4590 |
| TACGTTGTATCCATATCATAATATGTACATTTATATTGGCTCATG  | 4635 |
| TCCAACATTACCGCCATGTTGACATTGATTATTGACTAGTTATTA  | 4680 |
| ATAGTAATCAATTACGGGGTCATTAGTTCATAGCCCATATATGGA  | 4725 |
| GTTCCGCGTTACATAACTTACGGTAAATGGCCCGCCTGGCTGACC  | 4770 |
| GCCCAACGACCCCCGCCCATTTGACGTCAATAATGACGTATGTTCC | 4815 |
| CATAGTAACGCCAATAGGGACTTTCCATTGACGTCAATGGGTGGA  | 4860 |
| GTATTTACGGTAAACTGCCCACTTGGCAGTACATCAAGTGTATCA  | 4905 |
| TATGCCAAGTACGCCCCCTATTGACGTCAATGACGGTAAATGGCC  | 4950 |
| CGCCTGGCATTATGCCCAGTACATGACCTTATGGGACTTTCTCTAC | 4995 |
| TTGGCAGTACATCTACGTATTAGTCATCGCTATTACCATGGTGAT  | 5040 |
| GCGGTTTTTGGCAGTACATCAATGGGCGTGGATAGCGGTTTGACTC | 5085 |
| ACGGGGATTTCCAAGTCTCCACCCCATTTGACGTCAATGGGAGTTT | 5130 |
| GTTTTGGCACCAAAATCAACGGGACTTTCCAAAATGTCGTAACAA  | 5175 |
| CTCCGCCCCATTGACGCAAATGGGCGGTAGGCGTGTACGGTGGGA  | 5220 |
| GGTCTATATAAGCAGAGCTCAATAAAAGAGCCCAACCCCTCAC    | 5265 |
| TCGGCGCGCCAGTCTTCCGATAGACTGCGTCGCCCGGGTACCCGT  | 5310 |
| ATTCCAATAAAGCCTCTTGCTGTTTGCATCCGAATCGTGGTCTC   | 5355 |
| GCTGTTCTTTGGGAGGGTCTCCTCTGAGTGATTGACTACCCACGA  | 5400 |
| CGGGGGTCTTTTCATTGGGGGCTCGTCCGGGATTTGGAGACCCCT  | 5445 |
| GCCCAGGGACCACCGACCCACCACCGGGAGGTAAAGCTGGCCAGCA | 5490 |
| ACTTATCTGTGTCTGTCCGATTGTCTAGTGTCTATGTTTGATGTT  | 5535 |
| ATGCGCCTGCGTCTGTACTAGTTAGCTAACTAGCTCTGTATCTGG  | 5580 |
| CGGACCCGTGGTGGAACTGACGAGTTCTGAACACCCGGCCGCAAC  | 5625 |
| CCTGGGAGACGTCCCAGGGACTTTGGGGGGCCGTTTTTGTGGCCCG | 5670 |
| ACCTGAGGAAGGGAGTCGATGTGGAATCCGACCCCGTCAGGATAT  | 5715 |
| GTGGTTCTGGTAGGAGACGAGAACCTAAAACAGTTCCCGCCTCCG  | 5760 |
| TCTGAATTTTTGCTTTTCGGTTTGGAACCGAAGCCGCGCGTCTTGT | 5805 |
| CTGCTGCAGCGCTGCAGCATCGTTCTGTGTTGTCTCTGTCTGACT  | 5850 |
| GTGTTTCTGTATTTGTCTGAAAATTAGGGCCAGACTGTTACCACT  | 5895 |
| CCCTTAAGTTTGACCTTAGGTCACCTGGAAAGATGTCGAGCGGATC | 5940 |
| GCTCACAACCAGTCGGTAGATGTCAAGAAGAGACGTTGGGTTACC  | 5985 |
| TTCTGCTCTGCAGAATGGCCAACCTTTAACGTCGGATGGCCGCGA  | 6030 |
| GACGGCACCTTTAACCAGAGACCTCATCACCCAGGTAAAGATCAAG | 6075 |
| GTCTTTTACCTGGCCCGCATGGACACCCAGACCAGGTCCCTTAC   | 6120 |
| ATCGTGACCTGGGAAGCCTTGGCTTTTGACCCCCCTCCCTGGGTC  | 6165 |
| AAGCCCTTTGTACACCCTAAGCCTCCGCCTCCTCTTCCCTCCATCC | 6210 |
| GCCCCGTCTCTCCCCCTTGAACCTCCTCGTTTCGACCCCGCCTCGA | 6255 |
| TCCTCCCTTTATCCAGCCCTCACTCCTTCTCTAGGCGCCGGAATT  | 6300 |
| GAAGATCTGGGCAGGAAGAGGGCCTATTTCCCATGATTCCCTTCAT | 6345 |
| ATTTGCATATACGATACAAGGCTGTTAGAGAGATAATTAGAATTA  | 6390 |
| ATTTGACTGTAAACACAAAGATATTAGTACAAAATACGTGACGTA  | 6435 |
| GAAAGTAATAATTTCTTGGGTAGTTTGCAGTTTTTAAATTATGTT  | 6480 |

TTAAAATGGACTATCATATGCTTACCGTAACTTGAAAGTATTTCTG  
ATTTCTTGGCTTTATATATCTTGTGGAAAGGACGAGG

6525  
6566
