# Supplementary material for: In-Vitro Subtype-Specific Modulation of HIV-1 Trans-Activator of Transcription (Tat) on RNAi Silencing Suppressor Activity and Cell Death
Source: MDPI journal article supplement (doi:10.3390/v11110976), 2019-10-23

**A**

Normalized RSS activity by Microscopy

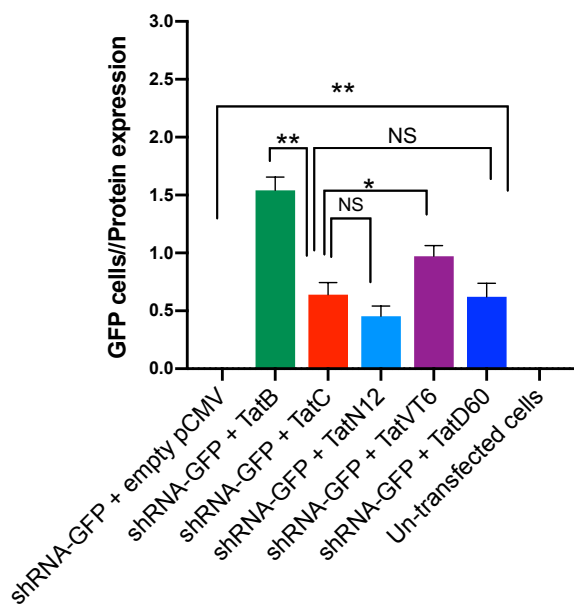**B**

Normalized RSS activity by Microscopy

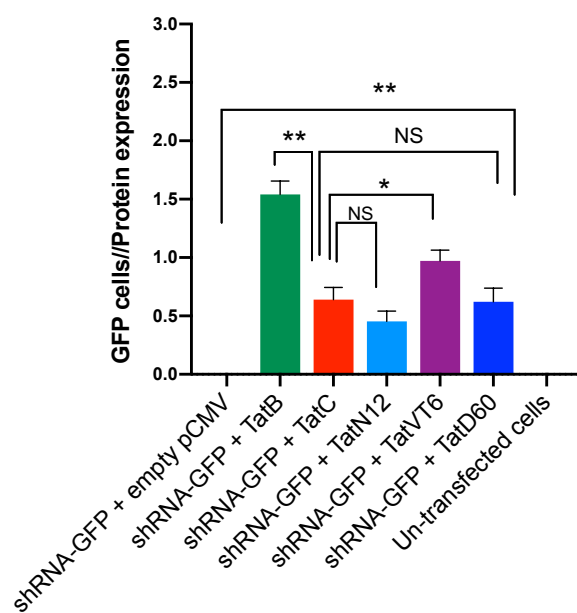**C**

Normalized Cell Death in HEK293T cells

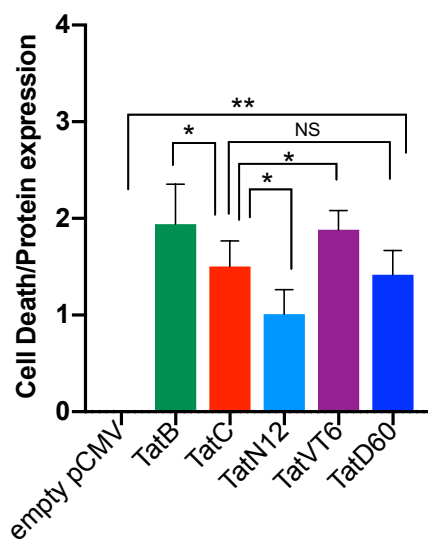**D**

Normalized Cell Death in TZM-bl Cells

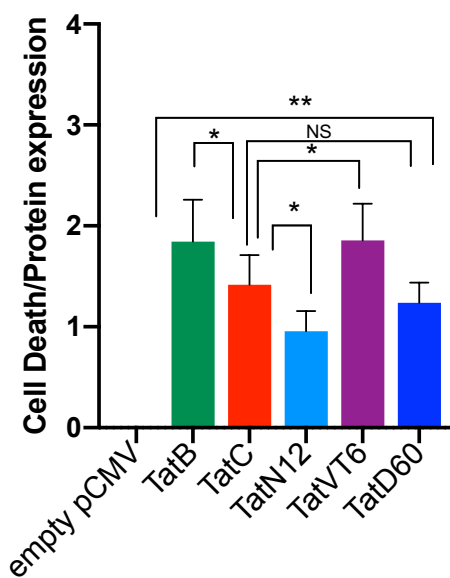

Supplement: s1 [file s1]
