# Supplementary figures and images for: In-Vitro Subtype-Specific Modulation of HIV-1 Trans-Activator of Transcription (Tat) on RNAi Silencing Suppressor Activity and Cell Death
Source: MDPI journal article supplement (doi:10.3390/v11110976), 2019-10-23

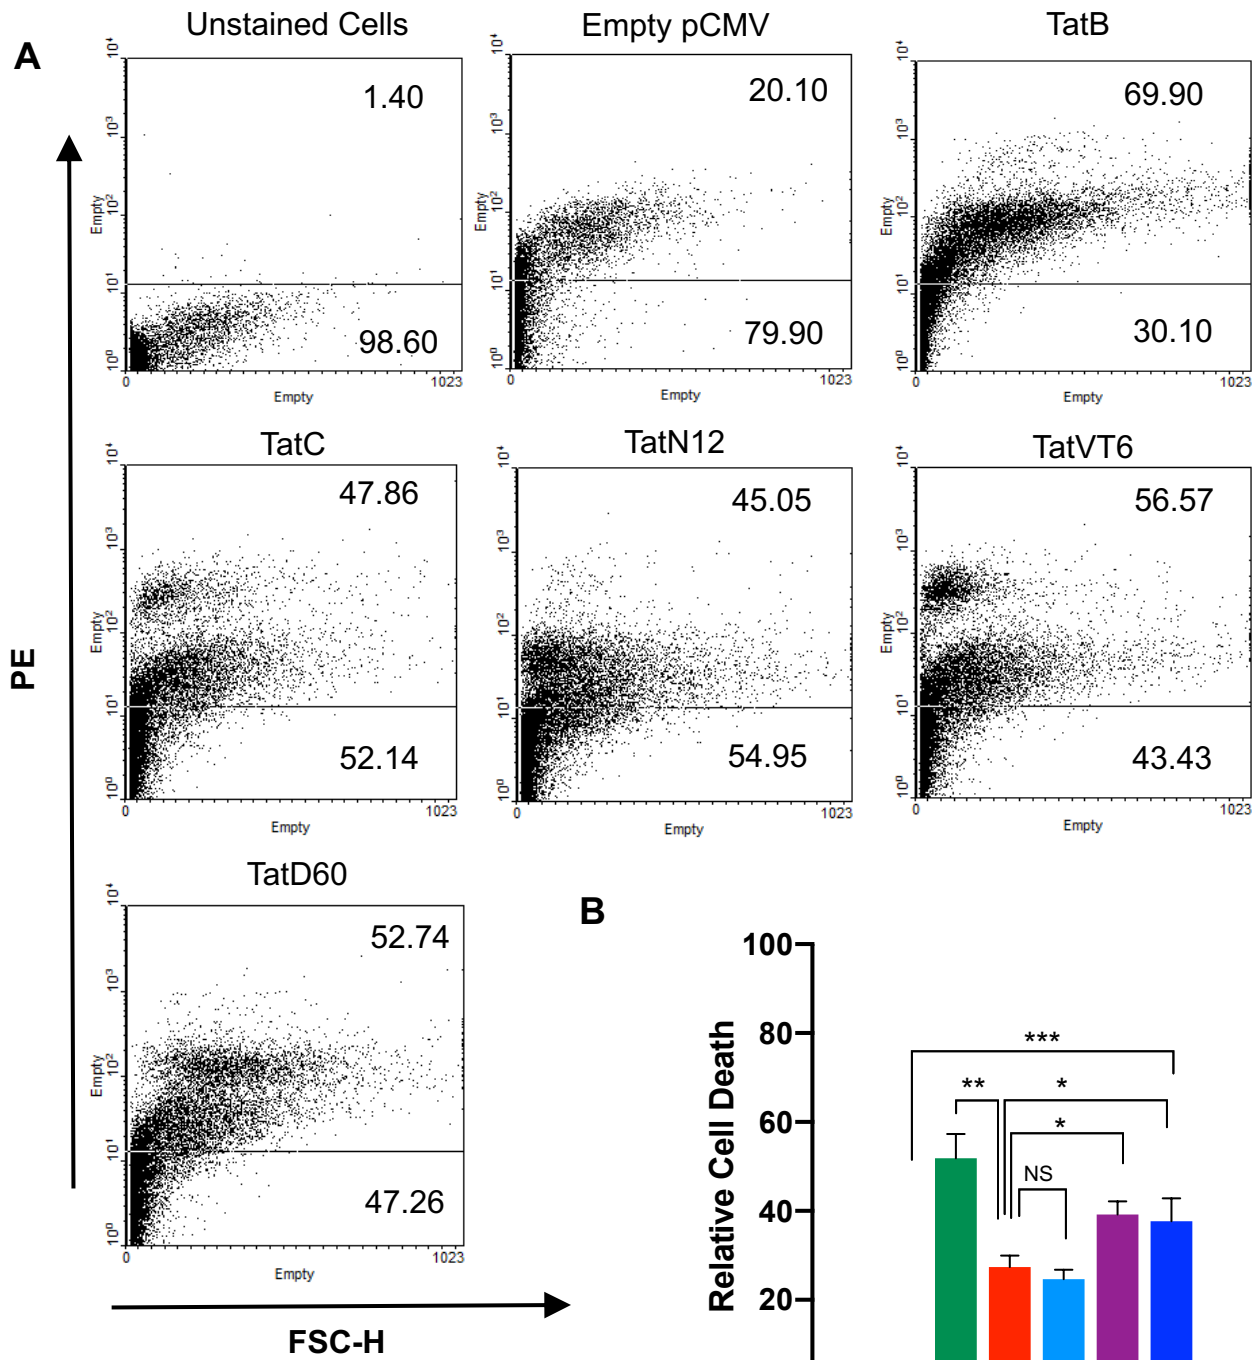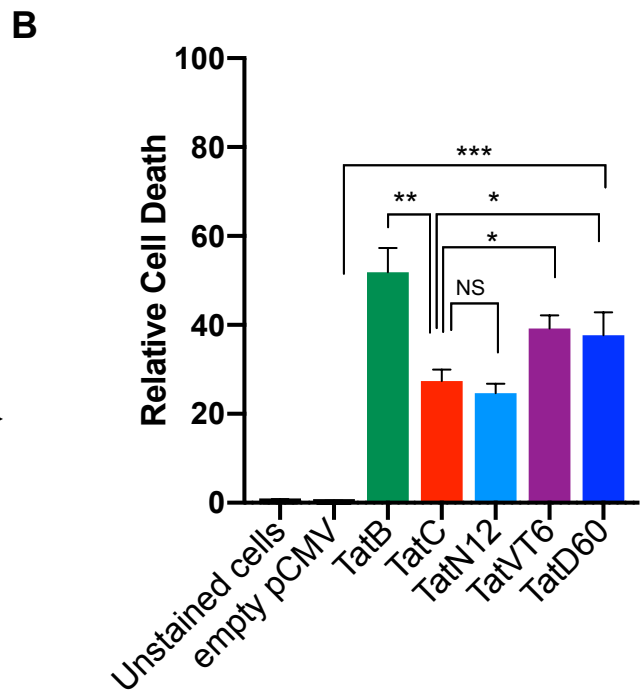

Supplement: s1 [file s1]

Un-transfected cells

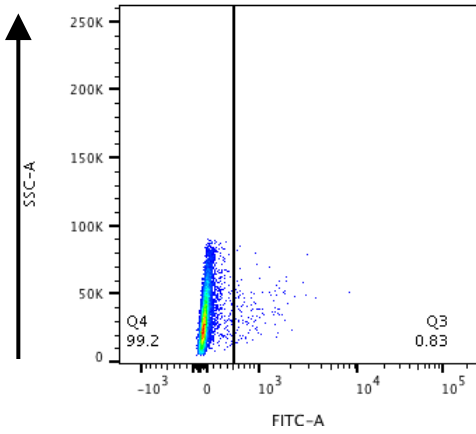

GFP cells + TatB

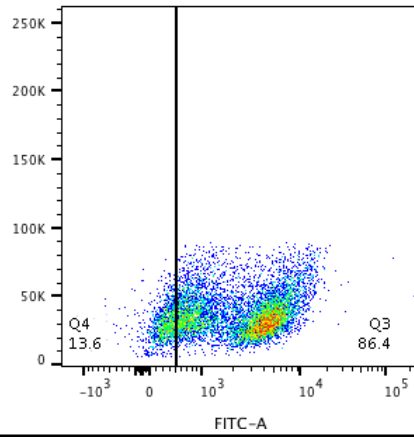

GFP cells + TatC

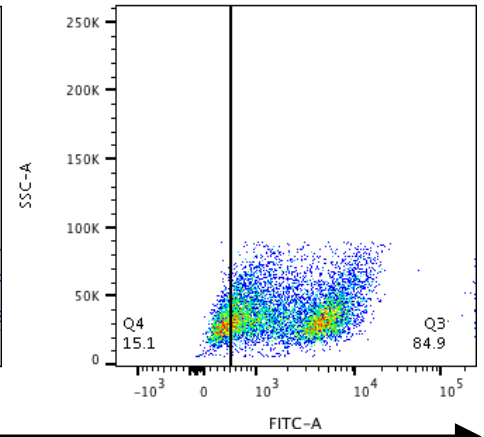

Supplement: s1 [file s1]
